# Supplementary material for: Cytokine-Induced iNOS in A549 Alveolar Epithelial Cells: A Potential Role in COVID-19 Lung Pathology
Source: Biomedicines. 2023 Oct 3;11(10):2699. doi: 10.3390/biomedicines11102699 (PMC10603955; doi:10.3390/biomedicines11102699)
Supplement: Supplementary file 1 [file biomedicines-11-02699-s001.zip › biomedicines-2609052-supplementary.pdf]

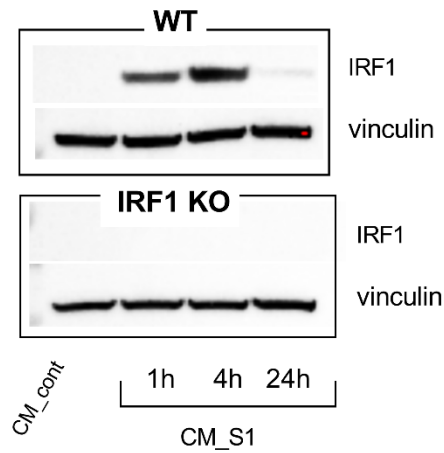

**Figure S1. Validation of IRF1 KO cells.** A549 WT and IRF1 KO were incubated in CM\_cont or CM\_S1. At the times indicated the expression of IRF1 protein was assessed by means of Western Blot analysis; representative blots are shown of three different experiments.

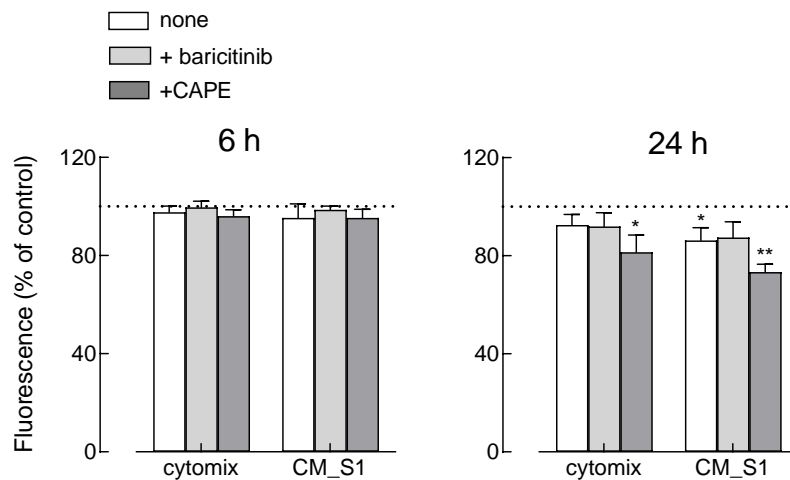

**Figure S2. A549 WT cell viability.** At the indicated times, cell viability was determined through the resazurin assay, as described in Methods, and expressed as percent of viability in cells incubated with CM\_cont. Each bar represents the mean  $\pm$  SEM of three independent experiments each performed in triplicate. \* $p < 0.05$ ; \*\* $p < 0.01$  vs CM\_cont (=100, dotted line) with One sample t test.
